# Supplementary material
Source: MDPI journal article supplement (https://www.mdpi.com/2071-1050/13/3/1377)
Supplement: s1 [file s1]

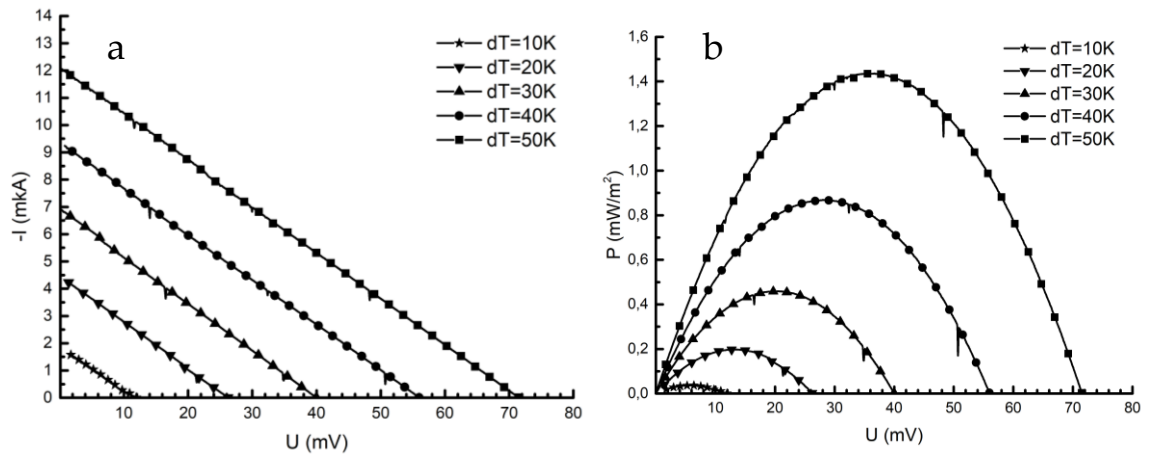

**Figure S1.** (a) I-V curves and (b) P-V curves for cells with salt bridge and basic.fiber Busofit respectively.

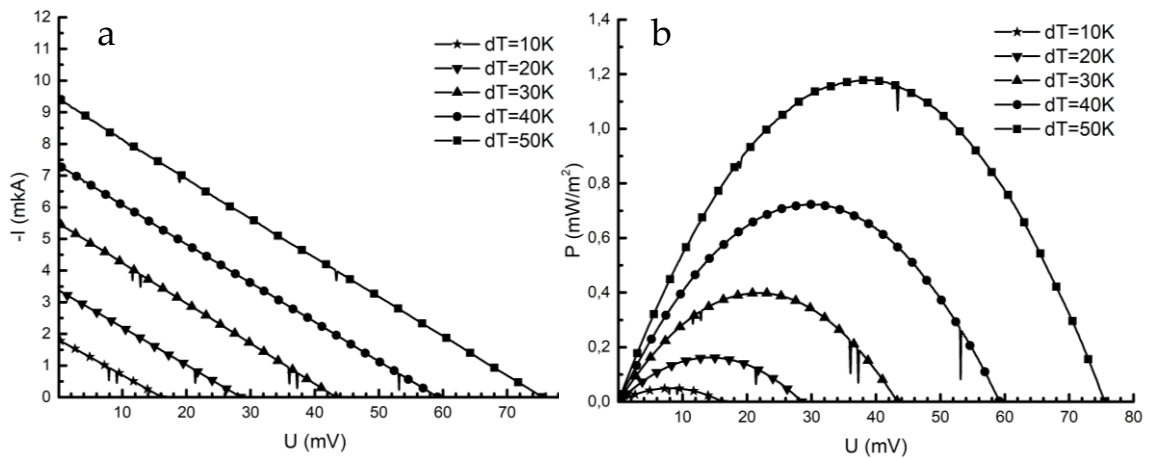

**Figure S2.** (a) I-V curves and (b) P-V curves for cells with salt bridge and Ag-sputtering Busofit respectively.

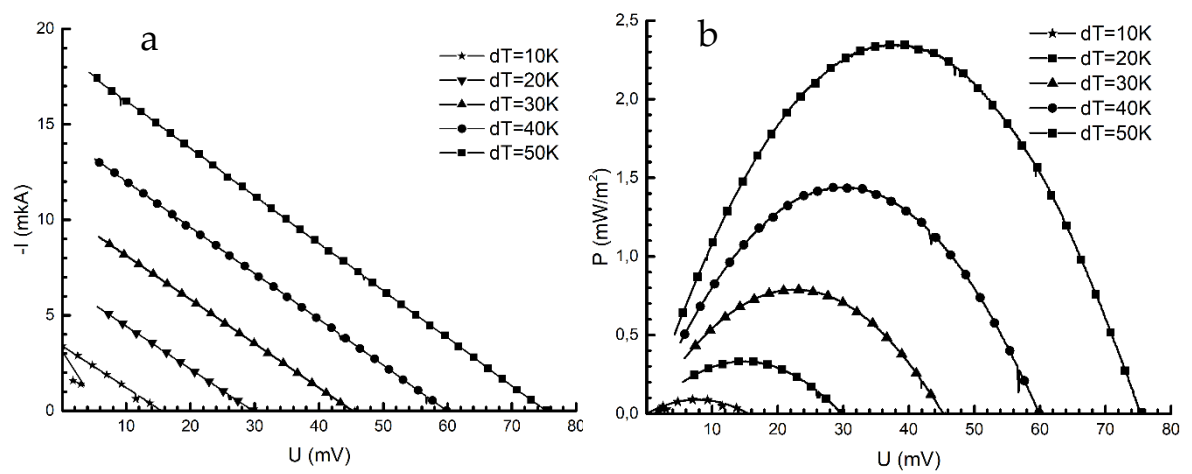

**Figure S3.** (a) I-V curves and (b) P-V curves for cells with salt bridge and Ti-sputtering Busofit respectively.

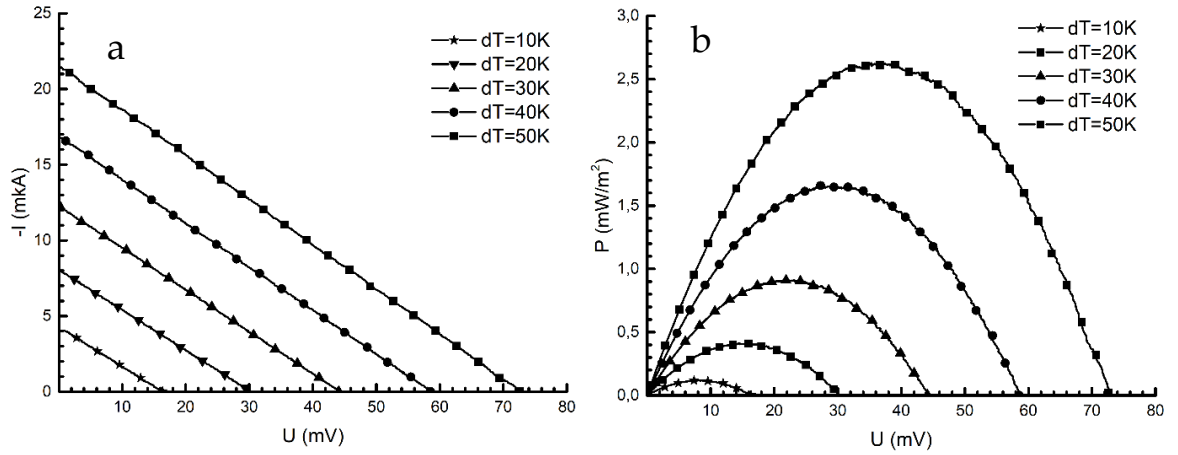

**Figure S4.** (a) I-V curves and (b) P-V curves for cells with salt bridge and Busofit with infiltrated dispersion of TiO<sub>2</sub> nanoparticles respectively.

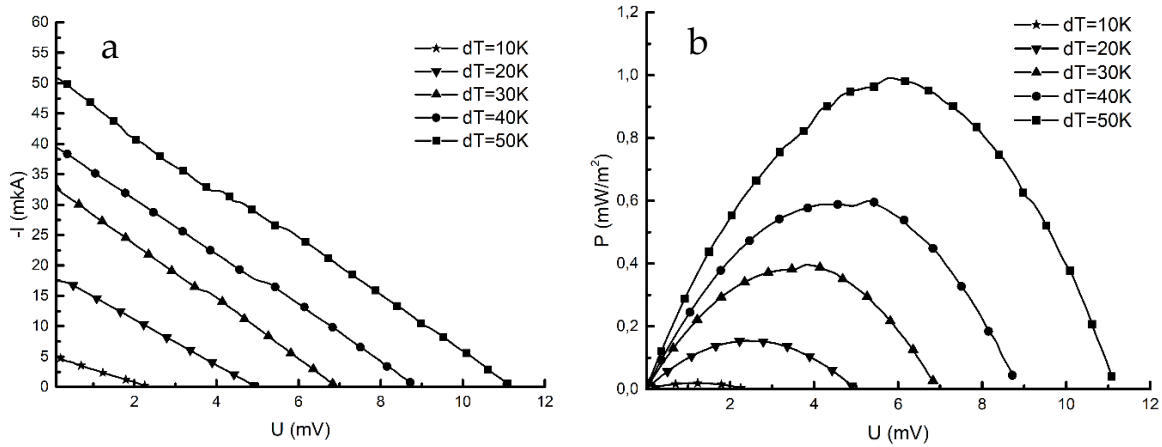

**Figure S5.** (a) I-V curves and (b) P-V curves for cells in CR 2025 case and basic fiber Busofit respectively.

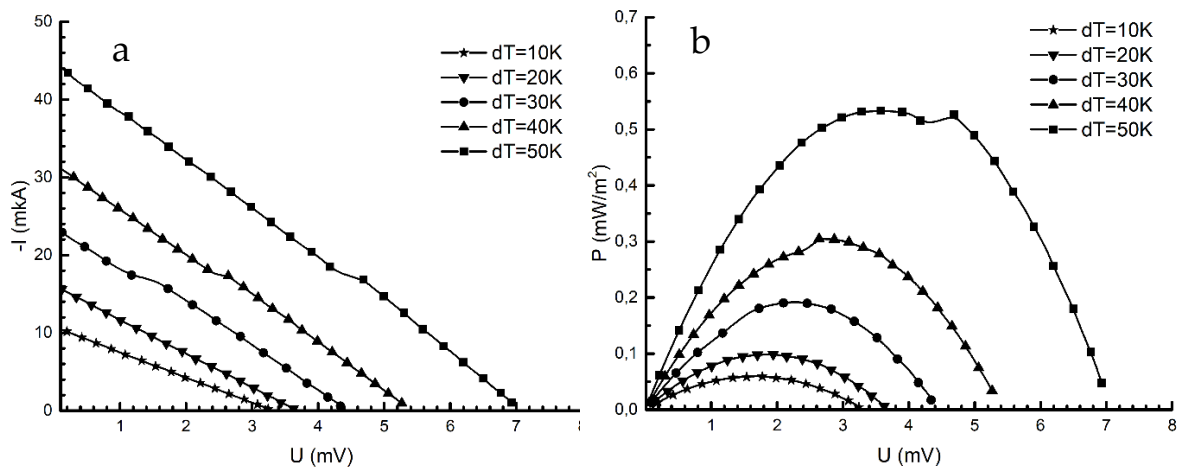

**Figure S6.** (a) I-V curves and (b) P-V curves for cells in CR 2025 case and Ag-sputtering Busofit respectively.

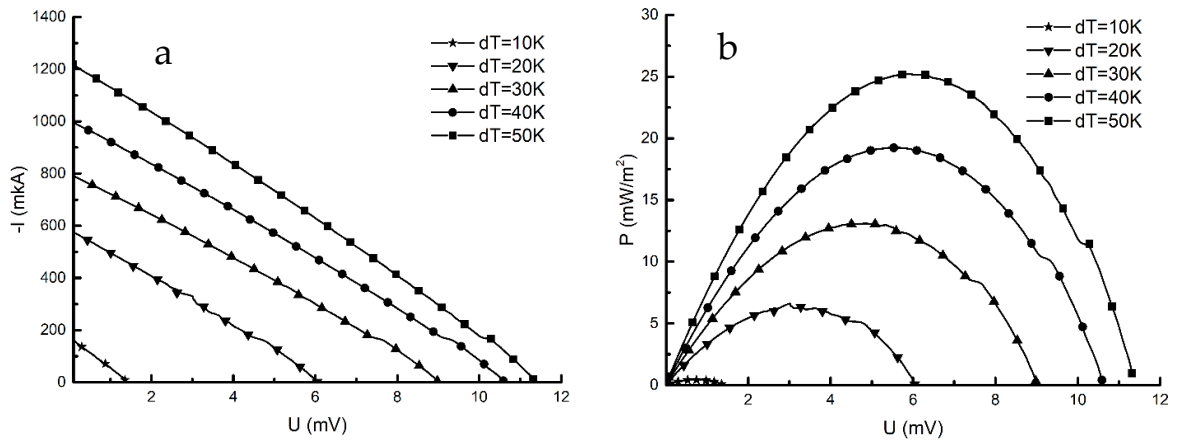

**Figure S7.** (a) I-V curves and (b) P-V curves for cells in CR 2025 case and Ti-sputtering Busofit respectively.

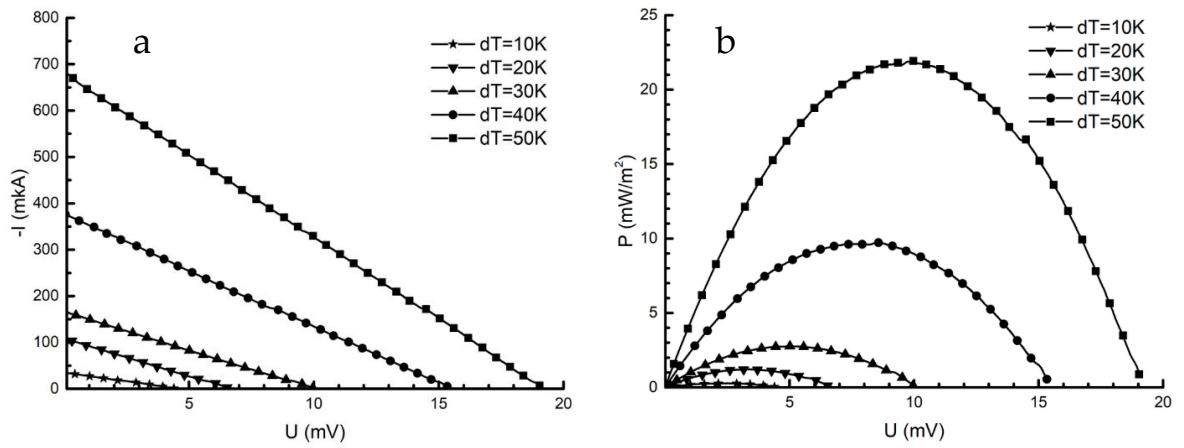

**Figure S8.** (a) I-V curves and (b) P-V curves for cells in CR 2025 case and Busofit with infiltrated dispersion of TiO<sub>2</sub> nanoparticles respectively.
